# Supplementary material for: Effectiveness of treatments for acute and subacute mechanical non-specific low back pain: a systematic review with network meta-analysis
Source: HighWire-hosted journal article supplement (doi:10.1136/bjsports-2020-103596), 2021-04-13
Supplement: bjsports-2020-103596supp002_data_supplement.pdf [file bjsports-2020-103596supp002_data_supplement.pdf]

### Multiple choice questions (MCQs)

1. Balancing benefits and harms, which is best strategy for the management of acute and subacute NS-LBP:
  - A. pharmacological interventions
  - B. non-pharmacological interventions**
  - C. bed rest
  - D. surgery
  
2. Paracetamol can be recommended as a treatment choice for acute and subacute NS-LBP?
  - A. yes, prescription of low dosage (500 mg/die)
  - B. yes, prescription of higher dosage (4000 mg/die)
  - C. yes, any dosage
  - D. no, it is not superior to inert treatment**
  
3. Among pharmacological interventions, which is best efficacious?
  - A. Muscle relaxants**
  - B. NSAIDS
  - C. opioids
  - D. paracetamol
  
4. In which treatments mild and moderate adverse events are often present?
  - A. manual therapy, heat wrap
  - B. opioids, NSAIDS, steroids**
  - C. paracetamol
  - D. muscle relaxant drugs
  
5. How was the overall certainty of the evidence for pain and disability outcomes in management of acute and subacute NS-LBP?
  - A. the range of overall certainty of the evidence was high
  - B. the range of overall certainty of the evidence was moderate
  - C. the range of overall certainty of the evidence varied**
  - D. the overall certainty of the evidence was not assessed
